1 **Multiplex RT-qPCR assay (N200) to detect and estimate prevalence of multiple SARS-CoV-2**  
2 **Variants of Concern in wastewater**

3 Meghan Fuzzen<sup>1\*</sup>, Nathanael B.J. Harper<sup>1\*</sup>, Hadi A. Dhiyebi<sup>1</sup>, Nivetha Srikanthan<sup>1</sup>, Samina Hayat<sup>1</sup>, Shelley  
4 W. Peterson<sup>2</sup>, Ivy Yang<sup>3</sup>, J.X. Sun<sup>3</sup>, Elizabeth A. Edwards<sup>3</sup>, John P. Giesy<sup>4,5,6</sup>, Chand S. Mangat<sup>2</sup>, Tyson E.  
5 Graber<sup>5</sup>, Robert Delatolla<sup>8</sup>, Mark R. Servos<sup>1</sup>

- 6 1. Department of Biology, University of Waterloo, Waterloo, ON, N2L 3G1, Canada  
7 2. One-Health Division, Wastewater Surveillance Unit, National Microbiology Laboratory, Public  
8 Health Agency of Canada, Winnipeg, MB, R3E 3M4, Canada  
9 3. Chemical Engineering and Applied Chemistry, University of Toronto, Toronto, ON, M5S 3E5,  
10 Canada  
11 4. Department of Veterinary Biomedical Sciences and Toxicology Centre, University of  
12 Saskatchewan, Saskatoon, SK S7N 5B3, Canada  
13 5. Department of Environmental Sciences, Baylor University, Waco, TX, USA  
14 6. Department of Zoology and Center for Integrative Toxicology, Michigan State University, East  
15 Lansing, MI, USA  
16 7. Children's Hospital of Eastern Ontario Research Institute, Ottawa, Ontario, K1H 8L1, Canada  
17 8. Department of Civil Engineering, University of Ottawa, Ottawa, Ontario, K1N 6N5, Canada

18 \*Equal contribution

19 **Abstract**

20 Wastewater-based surveillance (WBS) has become an effective tool around the globe for  
21 indirect monitoring of COVID-19 in communities. Quantities of viral fragments of SARS-CoV-2 in  
22 wastewater are related to numbers of clinical cases of COVID-19 reported within the  
23 corresponding sewershed. Variants of Concern (VOCs) have been detected in wastewater by  
24 use of reverse transcription quantitative polymerase chain reaction (RT-qPCR) or sequencing. A  
25 multiplex RT-qPCR assay to detect and estimate the prevalence of multiple VOCs, including  
26 Omicron/Alpha, Beta, Gamma, and Delta, in wastewater RNA extracts was developed and  
27 validated. The probe-based multiplex assay, named "N200" focuses on amino acids 199-202, a  
28 region of the N gene that contains several mutations that are associated with variants of SARS-  
29 CoV-2 within a single amplicon. Each of the probes in the N200 assay are specific to the  
30 targeted mutations and worked equally well in single- and multi-plex modes. To estimate  
31 prevalence of each VOC, the abundance of the targeted mutation was compared with a non-  
32 mutated region within the same amplified region. The N200 assay was applied to monitor  
33 frequencies of VOCs in wastewater extracts from six sewersheds in Ontario, Canada collected  
34 between December 1, 2021, and January 4, 2022. Using the N200 assay, the replacement of the  
35 Delta variant along with the introduction and rapid dominance of the Omicron variant were  
36 monitored in near real-time, as they occurred nearly simultaneously at all six locations. The  
37 N200 assay is robust and efficient for wastewater surveillance can be adopted into VOC  
38 monitoring programs or replace more laborious assays currently being used to monitor SARS-  
39 CoV-2 and its VOCs.

## 40 Introduction

41 Communities around the world have quickly adopted wastewater-based surveillance (WBS) of  
42 SARS-CoV-2 viral fragments to detect and infer prevalence of COVID-19 disease burden in communities  
43 (D'Aoust et al., 2021; Kitajima et al., 2020; Medema et al., 2020). Because it does not require testing of  
44 individual sensitivity and includes all individuals, symptomatic or asymptomatic, that contribute to the  
45 sewershed, WBS has several advantages over more costly and invasive clinical testing. WBS utilizes  
46 reverse transcription quantitative real-time polymerase chain reaction (RT-qPCR) based techniques  
47 targeting various regions of the SARS-CoV-2 genome, including the popular US-Centers for Disease  
48 Control (CDC) N1, N2 (nucleocapsid) and E (envelope), to test for the presence of SARS-CoV-2 in  
49 wastewater (Hamouda et al., 2021; Kitajima et al., 2020; Kumblathan et al., 2021).

50 Continuous emergence of Variants of Concern (VOCs) and Variants of Interest (VOIs) has  
51 presented additional challenges to the surveillance of SARS-CoV-2 and has been an area where WBS can  
52 provide more timely information quicker than clinical testing. In addition to clinical tracking of  
53 abundance of SARS-CoV-2 infections, RT-qPCR methods have been used to detect and monitor  
54 prevalence of emerging VOCs in wastewater (Carcereny et al., 2021; Graber et al., 2021; Lee et al., 2021;  
55 Peterson et al., 2022; Wurtzer et al., 2021). This information provides an integrated estimation of the  
56 relative abundance of variants within populations. There have been several examples of RT-qPCR assays  
57 for identification and quantifications of VOCs wastewater. The mutations N501Y and  $\Delta 69-70$  del in the  
58 spike protein or the presence of mutation D3L in the N gene have been targeted by RT-qPCR assays to  
59 monitor for the presence of VOCs in wastewaters across Canada (Peterson et al., 2022). Using an allele  
60 specific RT-qPCR, with an artificial mismatch, three mutations, HV69/70del, Y144del and A570D, were  
61 targeted to discriminate and quantify the Alpha from VOC relative to the wild type in wastewater of 19  
62 communities in the USA (Lee et al, 2021). Another assay targets mutations  $\Delta 69-70$  in the S gene to  
63 detect the Alpha and Beta variants respectively (Yaniv et al., 2021). An assay based on mutation D3L of

64 the gene, was applied for detection and quantification of relative proportion of the Alpha VOC (Graber  
65 et al., 2021). Those authors were able to effectively trace the increase of the proportion of Alpha variant  
66 in wastewater of Ottawa, Canada, in almost real time. The trends in incidence of Alpha were similar to  
67 that of the number of clinical cases in the community. These various studies demonstrate that WBS can  
68 rapidly provide information on incidence and prevalence of SARS-CoV-2 to authorities with sensitivity  
69 and lineage specificity. RT-qPCR assays are specific and can be deployed rapidly across existing WBS  
70 networks. The challenges with using RT-qPCR assays in surveillance of VOCs are the amount of time  
71 needed to develop and validate new assays each time a new VOC emerges as well as increasing the  
72 number assays being conducted to continually monitor for various VOCs and VOIs.

73 The objective of this study was to develop a multiplex RT-qPCR assay that could be used to  
74 simultaneously screen for several VOCs, as well as a marker of the total SARS-CoV-2 present in the  
75 sample so that an estimation of the relative proportion of VOCs can be reliably determined. The N gene  
76 region was selected for several reasons, including that this region is targeted by the N1 and N2 assays,  
77 developed by the US CDC, which are commonly used for monitoring wastewater (Lu et al., 2020). There  
78 is evidence to suggest that assays developed for the N-region of the SARS-CoV-2 genome have greater  
79 sensitivity for measuring various VOCs of SARS-CoV-2 in wastewater than assays targeting than does the  
80 S-(Yaniv et al., 2021) or the envelope regions (Pérez-Cataluña et al., 2021). The N-gene was selected as  
81 the target region as the target of the assay since it is also rich in mutations unique to VOCs (Kiryanov et  
82 al., 2022). Specifically, the 121-basepair region in the N-gene open reading frame (ORF) (nucleotides  
83 28,837 to 28,958) that includes single or multiple nucleotide variants for each VOC was selected (Table  
84 1). According to GISAID data summarized by nextrain.org (Hadfield et al., 2018), the nucleotide 28880-  
85 28882 (AA N:203) have one of the highest entropy levels in the SARS-CoV-2 genome, at 0.972, with  
86 nucleotides 28883-28885 (AA N:204) also having high entropy level of 0.711 (nextstrain.org; accessed  
87 April 1, 2022). The non-synonymous functional polymorphisms present in this region include R203M,

88 present in Delta, which increases the spread of the virus (Syed et al., 2021); R203K and G204R, (both  
89 present in Alpha, Gamma Lambda, and Omicron, which are related to increased infectivity, fitness and  
90 virulence (Johnson et al., 2021; Lee et al., 2021; Wu et al., 2021); and T205I, present in Beta and Mu  
91 variants that were predicted to have reduced antigenicity and greater affinity for HLA-I (Antonio et al.,  
92 2021). The presence of multiple mutations in a single region allowed for the design of a single amplicon,  
93 multiple probe assay, that can distinguish among several VOCs. A Universal probe, that targets an area  
94 of the amplicon without mutations allows for the quantification of the total SARS-CoV-2 signal,  
95 regardless of which variants are present in wastewater. This allows for the measurement of the total  
96 SARS-CoV-2 signal as well as providing estimations of the relative abundance of individual VOCs.

97 Prior to being incorporated into a wastewater surveillance program, the N200 assay was  
98 validated using several synthetic standards as well as samples of wastewaters. As an example of the  
99 utility of this assay, between November and January 2021, samples from six wastewater treatment  
100 facilities in Ontario, Canada, were examined with the N200 assay. During this period the N200 assay was  
101 utilized to test for the presence and increased frequency of the R203K/G204R mutation (present in the  
102 Omicron VOC), while comparing directly to the decrease in frequency of the R203M mutation (present  
103 in the Delta VOC), relative to a VOC-agnostic Universal marker, all within a single RT-qPCR reaction.

## 104 **Materials and Methods**

### 105 **Target selection**

106 To select an appropriate RT-qPCR target for testing wastewater, mutations that were indicative  
107 of each VOC, encompassing amino acids N:202-205 were identified. Mutations selected for each VOC  
108 and their known prevalence are presented in Table 1. The template sequence used for designs were  
109 retrieved from accession numbers provided by TWIST Bioscience (South San Francisco, CA, USA) for  
110 synthetic controls 14 (Alpha), 16 (Beta), 17 (Gamma) and 23 (Delta) and sequences were aligned using  
111 MAFFT (Kato et al., 2002).

112 Table 1. Amino acid mutations and corresponding nucleotide mutations present in the targeted  
113 region of the SARS-CoV-2 nucleocapsid genome (AA 199-214).

| Amino acid mutation(s)         | Nucleotide mutation(s) | Variant(s) of concern with mutation(s) | Mutation Prevalence (# of GISAID sequences)             |
|--------------------------------|------------------------|----------------------------------------|---------------------------------------------------------|
| S202S<br>(synonymous mutation) | A28877T<br>G28878C     | Gamma                                  | 98.0% and 97% respectively<br>(6,925,348)               |
| R203K                          | G28881A<br>G28882A     | Alpha<br>Gamma<br>Omicron              | 97.8% (1,144,688)<br>94.5% (120,031)<br>98.5% (295,436) |
| R203M                          | A28880T                | Delta                                  | 98.7% (3,984,837)                                       |
| G204R                          | G28883C                | Alpha<br>Gamma<br>Omicron              | 90.8% (1,144,688)<br>94.9% (120,031)<br>98.6% (295,496) |
| T205I                          | C28886T                | Beta                                   | 96% (40,518)                                            |

114 <sup>A</sup> Mutation prevalence was obtained from outbreak.info on January 14, 2022.

115

### 116 **Assay design**

117 Candidate forward and reverse primers that encompassed an amplicon 121 base pairs  
118 long containing all the desired mutations were designed with a target predicted  $T_m$  around 61°C  
119 and 40-60% GC content. Candidate primers were screened for hairpins, homodimers and  
120 heterodimers *in silico* using OligoAnalyzer by integrated DNA technologies (IDT;

121 RRID:SCR\_001363) with the “qPCR” parameter selected. Candidate primers that passed were  
122 then screened against NCBI’s non-redundant nucleotide database using BLAST (Altschul et al.,  
123 1990) and Primer-BLAST (Ye et al., 2012) to maximize mismatches with as much non-target  
124 genetic material as possible (human, microbes, food, etc.).

125         Five probes were designed to be selective for each of the mutations (Table 1, 2), as well  
126 as a universal probe for the “Universal” probe complementary to a nearby, highly conserved  
127 (bp 28891-28905, mutation rates <0.87% according to covidcg.org) region of the amplicon to  
128 detect total SARS-CoV-2 (Table 2, Figure 1). Probes were designed with the mutated base(s) at  
129 their center using PrimerExpress v3.0.1 with a GC content of 40-60%. BHQplus technology (LCG,  
130 Biosearch Technologies, Inc., California, USA) was used to increase the  $T_m$  of each probe, to have  
131 a predicted  $T_m$  of 69°C, which enabled the design of short probes approximately 15 nucleotides  
132 long. Probes were then tested for hairpins, homodimers, and heterodimers. Candidate probes  
133 were also screened for % identity to non-target sequences using NCBI’s BLAST tool (Agarwala et  
134 al., 2016).

135

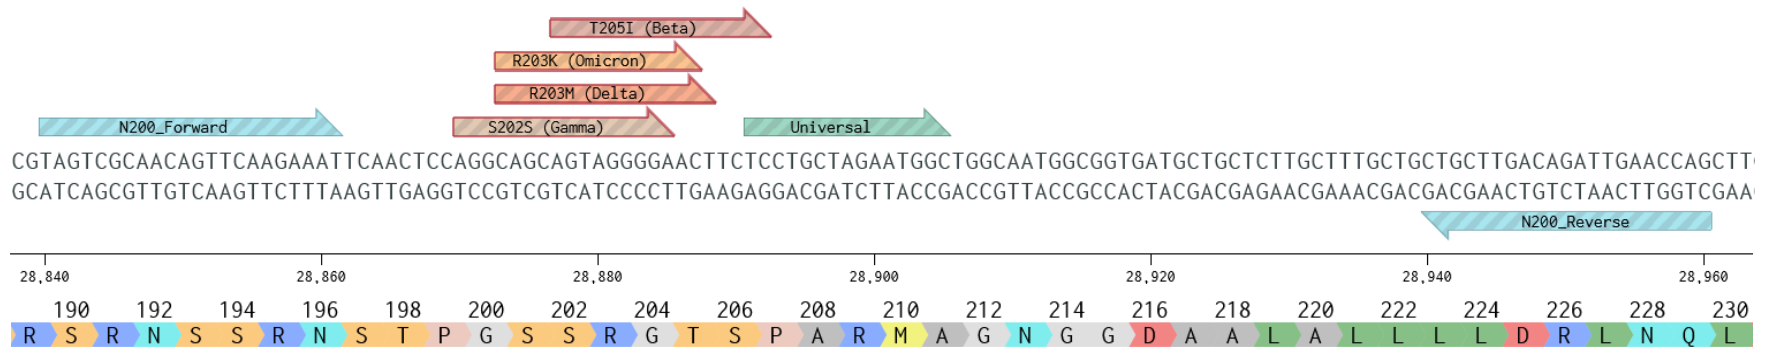

136 Figure 1. N200 assay amplicon with the location of the N200 forward and reverse primers and all probes are shown on a portion of the N gene of  
 137 the SARS-CoV-2 genome. The sequence, nucleotide numbers, and amino acid displayed are based on the SARS-CoV-2 reference genome  
 138 (Wuhan; NC\_045512.2; figure generated using Benchling.com).

## 139 **Assay Validation**

140 Initial tests of the N200 assay were performed on synthetic templates. TWIST synthetic  
141 RNA controls 2, 14, 16, 17, and 23 (TWIST Bioscience) were employed to generate standard  
142 curves (sequences representative in lieu of Wuhan-Hu-1 (Genbank MN908957.3), as well as the  
143 VOCs, Alpha, Beta, Gamma, and Delta VOCs, respectively). The N200 standard curves was  
144 assessed for linearity and efficiency by use of each of the probes in singleplex. After validation  
145 with synthetic templates assays were tested with wastewater RNA extracts to ensure successful  
146 amplification. Temperature gradients and primer/probe concentration gradients were  
147 performed to determine the optimal assay conditions in singleplex.

148 Cross-reactivity of probes was assessed by use of synthetic RNA controls. Each probe, in  
149 singleplex, was tested for reactivity with TWIST RNA controls 2, 14, 16, 17 and 23 at a  
150 concentration of 500 copies per reaction. Specificity was also determined in a triplex assay  
151 iteration (Universal, R203M, and R203K probes) by use of digital PCR (dPCR) at multiple  
152 concentrations of TWIST RNA controls (see dPCR section for additional details).

153 The N200 assay was validated in multiplex by comparing the efficiency,  $R^2$  and  $y$ -  
154 intercept of standard curves, as well as the estimated concentration and proportion of variants  
155 tested in wastewater relative to singleplex. Sensitivity of the N200 assay with the Universal,  
156 R203K, and R203M probes were determined by use of a 12-point standard curve (TWIST  
157 synthetic controls) with 15-replicates each. The limit of detection (LOD) was defined as the  
158 standard concentration at which >95% of the replicates were detected. This was performed by  
159 two independent labs (at the University of Waterloo and the Canadian National Microbiology  
160 Laboratory – Winnipeg) using the same suppliers of primers and probes and standards.



161

## 162 **Wastewater sample collection, concentration, and extraction**

163 Wastewater from the Regions of Peel (wastewater treatment plant influents GE Booth  
164 and Clarkson), York (access points Humber Air Management Facility (AMF) and Warden) and  
165 Waterloo (wastewater treatment plant influents Kitchener and Waterloo) Ontario, Canada. At  
166 each site wastewater was collected by plant operators using 24-hour cooled composite  
167 samplers (combined sample of three grabs at Warden) 3-5 times a week between November  
168 28<sup>th</sup>, 2021, and January 4<sup>th</sup>, 2022. Samples were aliquoted into 250 mL HPDE bottles (Systems  
169 Plus, Baden, Canada) and transported on ice to the University of Waterloo.

170 To concentrate RNA, 250 mL samples were well-mixed by inversion, 40 mL aliquots  
171 poured into 50 mL conical tubes with 4 g PEG-8000 and 0.9 g NaCl, then mixed on an orbital  
172 shaker at low speed at 4°C for 2 h before being stored at 4°C overnight (Wu et al., 2020).  
173 Samples were then centrifuged at 12,000 x g at 4°C for 90 minutes with no brake. The  
174 supernatant was discarded, and the remaining sample was centrifuged again at 12,000 x g at  
175 4°C for 5 min with no brake. The remaining supernatant was decanted and pipetted out and the  
176 wet weight of the resulting pellet recorded. Up to 250 mg of the pellet was used for extraction  
177 of RNA by use of the RNeasy PowerMicrobiome Kit (Qiagen, Germantown, MD) as per  
178 manufacturers instructions and included the addition of 100 µL of TRIzol (Thermo Fisher,  
179 Mississauga, Canada) to the pellet before bead-beating. Total RNA was eluted in 100 µL of  
180 RNase-free water.

## 181 **RT-qPCR**

182 One-step RT-qPCR was performed using TaqPath 1-Step Master Mix (Thermo Fisher,  
 183 Mississauga, Canada). The primer and probe sequences and final working concentrations are  
 184 presented in Table 2. RT-qPCR reactions were run in triplicate using 5 µL RNA template and a  
 185 final reaction volume of 20 µL. Cycling was performed on an OPUS or CFX 96 Touch qPCR  
 186 thermocycler (BioRad, Hercules, CA) as follows: RT at 50°C for 15 min, 95°C for 2 min, 45 cycles  
 187 of 95°C for 3 sec followed by 57°C for 30 sec. All qPCR plates were run with controls including  
 188 no template controls (NTCs), a positive control (wastewater sample with previously determined  
 189 amount of Delta variant) and a standard curve based on a homologous synthetic RNA (i.e., EDX,  
 190 TWIST).

191 Table 2. Forward (F) and Reverse (R) primer and probe designs for the N200 VOC assay. The  
 192 reporter and quencher moieties, and final working concentrations are included for each  
 193 oligonucleotide.

|         | Variant targeted | Oligo Name   | Sequence (5' to 3')    | Reporter/Quencher             | Working concentration (nM) |
|---------|------------------|--------------|------------------------|-------------------------------|----------------------------|
| Primers |                  | N200 Forward | TAGTCGCAACAGTTCAAGAAAT | N/A                           | 500                        |
|         |                  | N200 Reverse | CTGGTTCAATCTGTCAAGCAG  | N/A                           | 500                        |
| Probes  | All              | Universal    | TCCTGCTAGAATGGC        | FAM/BHQ-1 plus                | 100                        |
|         | Omicron/Alpha    | R203K        | CAGCAGTAAACGAAC        | Quasar670/BHQ-2 plus          | 400                        |
|         | Beta             | T205I        | AGTAGGGGAATTTCTT       | Cal Fluor Red 610 /BHQ-2 plus | 100                        |
|         | Gamma            | S202S        | AGGCAGCTCTAAACGA       | Quasar670/BHQ-2 plus          | 100                        |
|         | Delta            | R203M        | CAGCAGTATGGGAACT       | Cal Fluor Gold 540/BHQ-1 plus | 400                        |

194

## 195 Digital PCR (dPCR)

196 For precise quantification, commercial standards were analyzed via singleplex one-step  
 197 RT-dPCR (QIAcuity, Qiagen, Hilden, Germany). QIAcuity One-Step Viral RT-PCR Kit (Qiagen)  
 198 together with CDC\_N1 probe and primers (Lu et al., 2020) were used to determine absolute  
 199 copy number (cp) of RNA in the following SARS-CoV-2 genomic RNA standards: TWIST

200 Bioscience Controls 2, 14, 16, 17, 23. Testing for specificity of probes was also conducted using  
201 the N200 assay in triplex (Universal, R203M, and R203K probes) with two concentrations of  
202 TWIST Bioscience Controls 14, and 23. Reactions consisted of 10  $\mu$ L of RNA template, forward  
203 and reverse primers (working concentration of 500 nM each), probe (working concentration of  
204 125 nM for N1, or 100, 400 and 400 nM for the Universal, R203M and R203K probes  
205 respectively), 10  $\mu$ L of supermix, 0.4  $\mu$ L of reverse transcriptase, and 14.6  $\mu$ L of PCR-grade water  
206 to make up the balance of the 40  $\mu$ L reaction. All reactions were performed in triplicate using  
207 24 well x 26,000 channel plates. Cycling was performed on the QIAcuity as follows: RT at 50°C  
208 for 30 min, 95°C for 2 min, with 40 cycles at 95°C for 3 sec then annealing at 55°C or 57°C (for  
209 N1 and N200 assays respectively) for 30 sec. The N200 assay was also tested on RT-dPCR in  
210 triplex (Universal, R203M, and R203K probes) using the TWIST Bioscience Controls 23 and 48 at  
211 multiple concentrations to determine the specificity of the assay.

## 212 **Data Analysis**

213 Samples were quantified (copies/well) by use of a 7-point standard curve with the  
214 relevant TWIST standard. Samples were then corrected for elution volume and volume of  
215 wastewater extracted and reported as copies/mL wastewater (Quantity). The proportion of  
216 total Quantity associated with each VOC in a sample was determined by use of the equation  
217 mutation specific for the VOC (Equation 1).

$$218 \quad \% \text{ Variant} = (\text{Quantity of target mutation} / \text{Quantity of SARS-CoV-2 (Universal)}) * 100 \quad (1)$$

## 219 **Results**

### 220 **N200 assay conditions and performance**

221           The N200 assay performed well with all probes in singleplex. When tested with a serial  
222 dilution of TWIST standards, the singleplex standard curves were linear, had an efficiency near  
223 100%, and the slopes and y-intercepts were comparable between each of the probes (Table 3).  
224 The N200 assay performed similarly when tested in singleplex, duplex and triplex (Table 3). All  
225 probes targeting mutations were found to be highly specific with little to no cross-reactivity for  
226 non-target templates using qPCR (in singleplex; Table 4). Using RT-qPCR, this was demonstrated  
227 by the lack of amplification on all VOC TWIST templates without the target mutation (Table 4).  
228 Some cross-reactivity was observed between the T205I probe and the Wuhan variant control  
229 (TWIST Control 2; Table 4), but this accounted for less than 5% of the signal observed on the  
230 homologous template. Positive amplification with similar sensitivity was seen on of all TWIST  
231 templates tested was observed with the Universal probe (Table 4). High target specificity of  
232 each probe was confirmed by RT-dPCR, where in the presence of a high concentration of non-  
233 target template, almost no amplification was detected (Table 5). Copy numbers reported by the  
234 mutation probes (R203M, R203K) were comparable to the copy numbers reported by the  
235 Universal probe in the RT-dPCR reactions at multiple concentrations, which further suggests  
236 that each probe has similar sensitivities and efficiencies (Table 5). The LOD (95% detection) was  
237 determined to be 4-6 copies per reaction for the Universal, R203K, and R203M probes  
238 respectively when tested in two separate laboratories.

239 Table 3. Performance metrics of the N200 VOC assay for each of the probes in singleplex, duplex or  
 240 triplex.

|                          | Assay                           | Slope  | y-intercept | Efficiency | R <sup>2</sup> |
|--------------------------|---------------------------------|--------|-------------|------------|----------------|
| Universal                | Singleplex                      | -3.347 | 40.236      | 98.9       | 0.990          |
|                          | Duplex (with R203M)             | -3.366 | 39.50       | 98.2       | 0.991          |
|                          | Duplex (with R203K)             | -3.299 | 38.793      | 101.0      | 0.990          |
|                          | Duplex (with S202S)             | -3.311 | 40.207      | 100.5      | 0.990          |
|                          | Duplex (with T205I)             | -3.461 | 39.773      | 94.5       | 0.990          |
|                          | Triplex (with R203M, R203K)     | -3.443 | 39.661      | 95.2       | 0.995          |
| R203K<br>(Omicron/Alpha) | Singleplex                      | -3.429 | 38.834      | 95.7       | 0.998          |
|                          | Duplex (with Universal)         | -3.334 | 39.585      | 99.5       | 0.991          |
|                          | Triplex (with Universal, R203M) | -3.464 | 39.902      | 94.4       | 0.995          |
| T205I<br>(Beta)          | Singleplex                      | -3.396 | 39.951      | 97.0       | 0.997          |
|                          | Duplex (with Universal)         | -3.533 | 39.952      | 91.9       | 0.994          |
| S202S<br>(Gamma)         | Singleplex                      | -3.249 | 40.363      | 103.1      | 0.998          |
|                          | Duplex (with Universal)         | -3.352 | 39.891      | 98.8       | 0.988          |
| R203M<br>(Delta)         | Singleplex                      | -3.541 | 40.365      | 91.6       | 0.998          |
|                          | Duplex (with Universal)         | -3.387 | 39.513      | 97.4       | 0.990          |
|                          | Triplex (with Universal, R203K) | -3.442 | 39.124      | 95.2       | 0.995          |

241

242 Table 4. Cycle Threshold (CT) value (mean) of N200 assay performed in singleplex with probes targeting  
 243 a mutation (R203K; T205I; S202S; R203M) or a common region (Universal) of the SARS-CoV-2 genome.  
 244 Individual probes were performed on each of five synthetic templates synthesized by TWIST Bioscience  
 245 (San Francisco, USA), controls for the original Wuhan strain and for each VOC. ND = not detected

|                  | Universal<br>(All) | R203K<br>(Omicron/Alpha) | T205I<br>(Beta) | S202S<br>(Gamma) | R203M<br>(Delta) |
|------------------|--------------------|--------------------------|-----------------|------------------|------------------|
| Twist 2 (Wuhan)  | 29.52              | ND                       | 35.90           | ND               | ND               |
| Twist 14 (Alpha) | 29.73              | 30.1                     | ND              | ND               | ND               |
| Twist 16 (Beta)  | 29.49              | ND                       | 30.05           | ND               | ND               |
| Twist 17 (Gamma) | 29.40              | ND                       | ND              | 27.69            | ND               |
| Twist 23 (Delta) | 30.44              | ND                       | ND              | ND               | 29.16            |

246

247 Table 5. Gene copies/ $\mu\text{L}$  of RNA (mean  $\pm$  SD) detected by the Universal, R203M, or R203K probes in the  
248 N200 assay (triplexed) when tested against TWIST controls for variants of SARS-CoV-2 using RT-dPCR.

|                       | Dilution from<br>stock<br>( $\sim 1 \times 10^4$<br>copies/ $\mu\text{L}$ ) | Universal<br>(All) | R203K<br>(Omicron/Alpha) | R203M<br>(Delta) |
|-----------------------|-----------------------------------------------------------------------------|--------------------|--------------------------|------------------|
| Twist 23<br>(Delta)   | 5x                                                                          | 2769 $\pm$ 173     | 0 $\pm$ 0                | 2767 $\pm$ 173   |
|                       | 500x                                                                        | 25 $\pm$ 2         | 0 $\pm$ 0                | 25 $\pm$ 2       |
|                       | 5000x                                                                       | 3 $\pm$ 1          | 0 $\pm$ 0                | 3 $\pm$ 1        |
| Twist 48<br>(Omicron) | 5x                                                                          | 824 $\pm$ 12       | 820 $\pm$ 22             | 2 $\pm$ 2        |
|                       | 50x                                                                         | 78 $\pm$ 3         | 77 $\pm$ 3               | 0 $\pm$ 0        |
|                       | 500x                                                                        | 5 $\pm$ 0          | 5 $\pm$ 0                | 0 $\pm$ 0        |

249

#### 250 **Performance of N200 assay with samples of wastewater**

251 The triplex N200 assay was applied to wastewater samples throughout December 2021  
252 and January 2022 to monitor for community transmission of the Omicron VOC, which would be  
253 signified by decrease in the proportion of the R203M (Delta) mutation and an increase in the  
254 R203K mutation (Omicron). The total SARS-CoV-2 (Universal) signal in samples during this  
255 period started out low, but rapidly increased over the sampling period (Figure 2). During this  
256 time, we observed a rapid transition in relative abundance of mutations from being dominated  
257 by R203M (Delta) to being dominated by R203K (Omicron) at all monitoring locations (Figure 3).

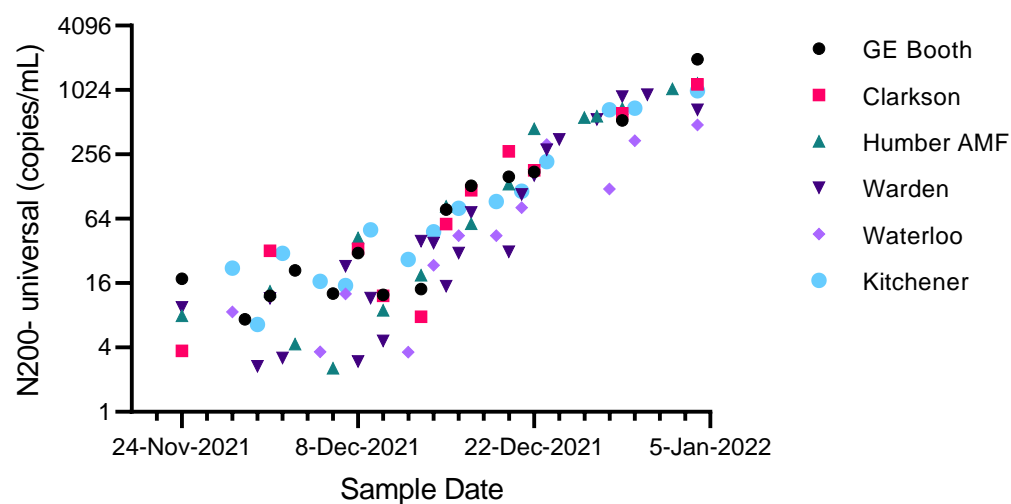

258

259 Figure 2. SARS-CoV-2 signal measured in municipal wastewater using the N200 assay with the Universal  
260 probe in a multiplexed reaction (Log<sub>2</sub> scale – copies/mL). Samples from the Peel (GE Booth and  
261 Clarkson), York (Humber AMF and Warden) and Waterloo (Waterloo and Kitchener) Regions were  
262 collected during the period encompassing both the introduction of Omicron into these communities and  
263 the concomitant reduction of the endemic Delta VOC.  
264

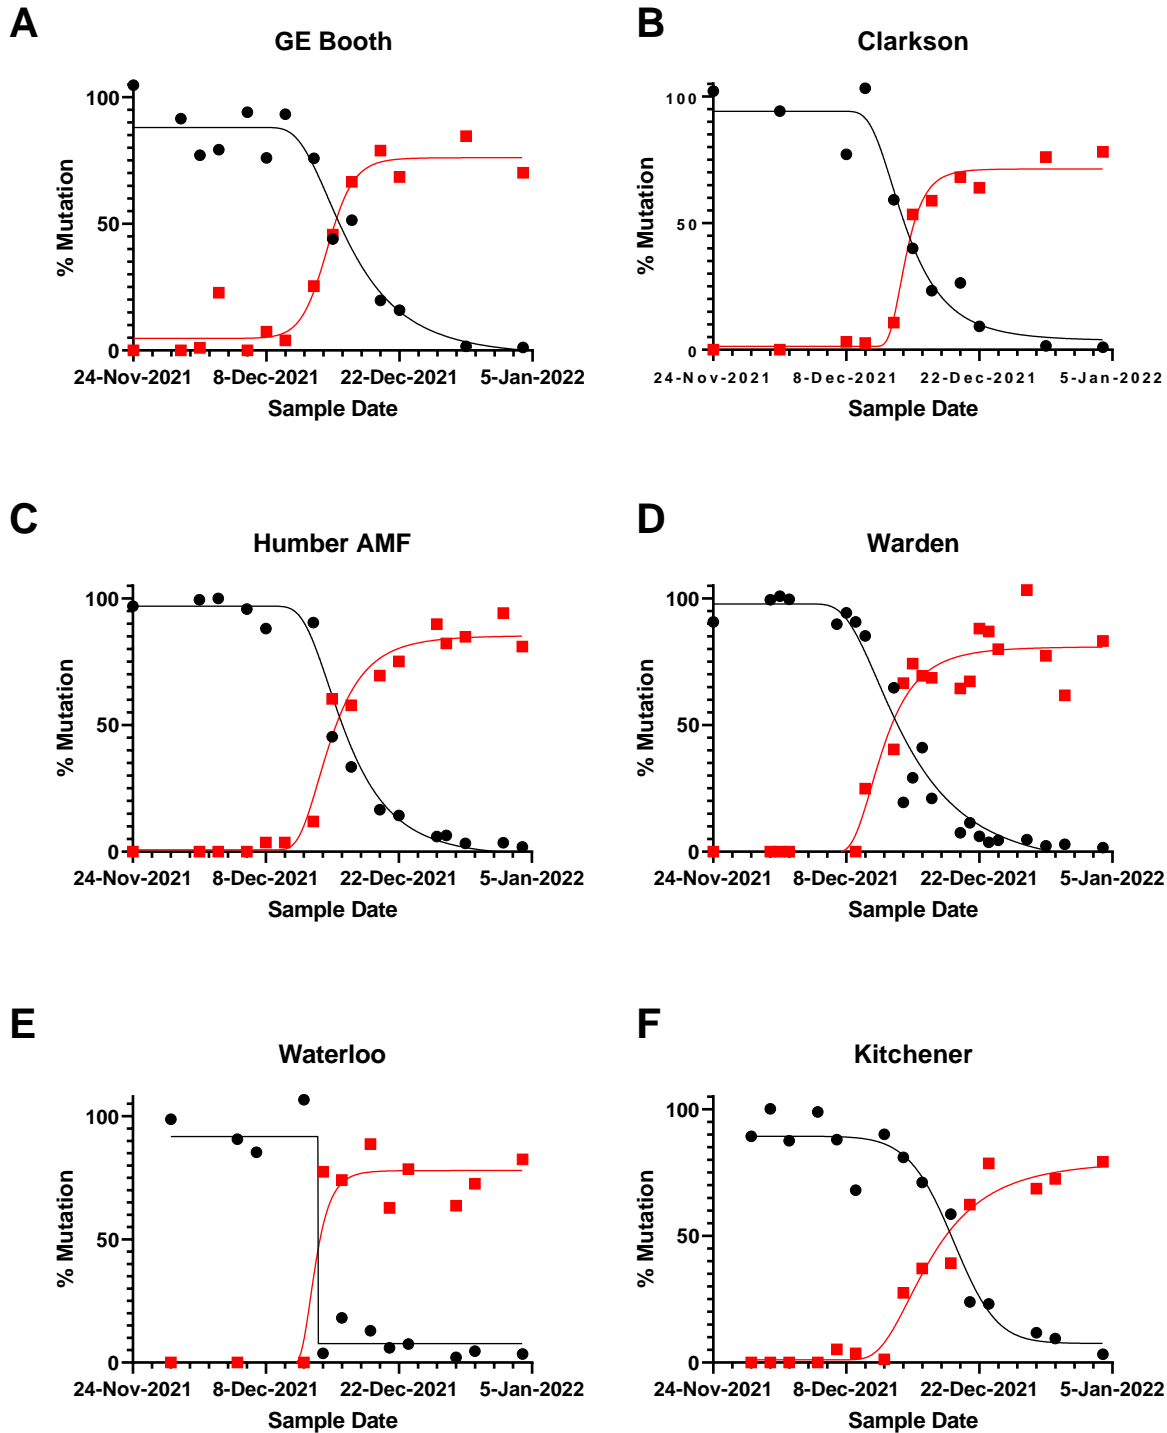

265

266 Figure 3. Application of the N200 triplex assay to monitor the relative abundance (%) of the mutations  
267 R203M (black circles- presumed Delta) or R203K/G204R (red squares – presumed Omicron) in municipal  
268 wastewater effluent. Effluent was collected from the Region of Peel (A, B), York Region (C, D) and  
269 Waterloo Region (E, F) using composite (A-B, D-F) and grab (C) sampling. Lines drawn through points are  
270 a 5-point sigmoidal curve calculated using GraphPad PRISM (v 9.3.1).



## 271 Discussion

272 This study presents an RT-qPCR approach for detection of SARS-CoV-2 and VOCs  
273 Omicron/Alpha, Beta, Gamma and Delta in a multiplexed assay with a single amplicon. The  
274 specificity and sensitivity of the N200 assay allow for simultaneous detection and quantification  
275 of mutations associated with VOCs. These individual assays were multiplexed and validated in  
276 duplex and triplex reactions, which allowed for rapid, cost-effective detection and quantitation  
277 of mutations associated with VOCs. Relative amounts of these mutations are then compared to  
278 a non-mutated region of the same amplicon to estimate the prevalence of current VOCs in a  
279 wastewater sample. This assay was able to track the initial presence and then the transition  
280 from the R203M mutation (i.e., Delta) as it was replaced by the R203K/G204R mutation (i.e.,  
281 Omicron/Alpha) in multiple communities in south-central Ontario in December 2021. This is  
282 representative of the transition from the Delta variant to the Omicron variant observed in  
283 clinical cases at this time in these communities.

284 In addition to R203M (Delta) and R203K/G204R (Omicron/Alpha) targets, probes  
285 targeting the T205I (Beta) mutation and the silent mutation in the amino acid S202 (Gamma),  
286 allow for surveillance of known VOCs using a single assay. Having multiplexed, variant specific  
287 probes that are compared to a Universal reference within the same amplicon is beneficial for  
288 improved consistency and accuracy of measuring relative prevalence of variants. As the gene  
289 targets are all in the same 121 bp amplicon, there is minimal concern about the dynamics of  
290 different regions of the SARS-CoV-2 genome in either the wastewater system itself, or in the  
291 extraction process. Because the reactions occur together in a multiplexed assay there is  
292 reduced variability and replication compared to running assays separately. This approach saves

293 resources and time, as fewer reactions are run per sample. Critically, this assay also saves  
294 sample volume, which is often limited, allowing for additional assays to be run on the same  
295 extract or reducing the need for multiple extractions to be performed. Ultimately it makes the  
296 process more efficient, reduces turnaround time and improves quality.

297         The combined use of Universal and VOC-specific probes in the N200 assay to estimate  
298 prevalence of VOCs in wastewater is advantageous for several reasons. First, since when  
299 multiplexed, the mutation and comparator are being assessed within the same amplicon as well  
300 the same reaction, this method provides increased precision of VOCs prevalence estimates.  
301 Additional confidence in prevalence of VOCs is provided by the fact that the mutation and  
302 Universal signals can be quantified using the same standard. In comparison, other VOC qPCR  
303 assays estimate prevalence by comparing a mutant allele to a genetic marker of SARS-CoV-2 in  
304 another amplicon, /genetic locus such as the CDC\_N1 (Vogels et al., 2021; Wolfe et al., 2021),  
305 or by comparing the frequencies of the mutant and “wild-type” (e.g., ancestral/endemic allele)  
306 at the same locus (Chan et al., 2022; Graber et al., 2021; Lee et al., 2021; Peterson et al., 2022).  
307 While these assays can produce accurate data (from both analytical and clinical perspectives),  
308 there are additional controls needed to account for variations in efficiencies of variation (inter-  
309 assay variability and matching standard quantities), that are eliminated by the N200 assay.  
310 Estimations of VOC prevalence are important during wastewater surveillance SARS-CoV-2 in  
311 that they can provide useful information to public health units in a timely manner.

312         During analyses of wastewaters through late 2021 and early 2022, a rapid increase in  
313 the SARS-CoV-2 signal (Universal probe) as well as a quick change over of the dominant variant  
314 from Delta (R203M) to Omicron (R203K/G204R) was observed at all sites monitored. The assay

315 first detected the R203K mutation in a sample collected from GE Booth (Peel Region) on  
316 December 3<sup>rd</sup>, 2021. While it is possible that this early detection of the R203K/G204R mutation  
317 could have been a variant other than Omicron, within a week of this detection, the  
318 R203K/G204R mutation was consistently detected in the wastewater at this site while R203M  
319 decreased in proportion. The use of two mutation targets provided confidence in the data as it  
320 was being collected and reported because both a decrease in the proportion of the R203M  
321 mutation (Delta) and an increase in the proportion of the R203K/G204R mutations (Omicron)  
322 occurred simultaneously. This data was reported to public health partners within a week of  
323 samples being collected and this was immediately disseminated to the public by the Public  
324 Health Unit as part of a weekly Epi-Report ([https://data.peelregion.ca/documents/profile-of-](https://data.peelregion.ca/documents/profile-of-covid-19-cases/explore)  
325 [covid-19-cases/explore](https://data.peelregion.ca/documents/profile-of-covid-19-cases/explore)). Rapid emergence of Omicron presented a major challenge for clinical  
326 testing and sequencing capacity. This was also confounded by the holiday season in Ontario.  
327 The wastewater data in general, quickly became important to Public Health Units as the clinical  
328 testing became less reliable because of changes to testing eligibility in Ontario. They were able  
329 to confirm the rapid replacement of Delta with the Omicron variant using wastewater that was  
330 independent of clinical testing (Arts et al., 2022).

331         The N200 multiplex qPCR was developed to improve estimates of the proportion of  
332 various variants in wastewater, while also making the assay more efficient to use in terms of  
333 reduced use of extracts, reagents, and time. The assay was validated using synthetic templates  
334 and was successfully applied to monitor for the emergence of the Omicron variant in several  
335 communities in Ontario. Although, this assay is one among several now available for detection  
336 of VOCs in wastewater, the unique design, with a single amplicon, multiple target mutations,

337 and universal comparator targeting a highly mutable area of the N-gene make it very useful in  
338 wastewater-based surveillance of SARS-CoV-2.

339

#### 340 **Acknowledgements**

341 Funding for this project was provided by the Ontario Ministry of the Environment, Conservation  
342 and Parks, and NSERC Discovery and Canada Research Chairs. The research published in this  
343 paper is part of the project titled “Next generation solutions to ensure healthy water resources  
344 for future generations” funded by the Global Water Futures program, Canada First Research  
345 Excellence Fund. Additional information is available at [www.globalwaterfutures.ca](http://www.globalwaterfutures.ca). The  
346 Municipal and Public Health Unit staff contributed to sample collection and provided valuable  
347 advice. Codey Dueck (PHAC) for laboratory analysis supporting LOD determinations. Yash  
348 Badlani, Carly Sing-Judge, Emily Dodsworth and Samantha Maerten assisted with sample  
349 preparation and analysis.

## 350 **References**

- 351 Agarwala, R., Barrett, T., Beck, J., Benson, D.A., Bollin, C., Bolton, E., Bourexis, D., Brister, J.R.,  
352 Bryant, S.H., Canese, K., Charowhas, C., Clark, K., Dicuccio, M., Dondoshansky, I., Federhen,  
353 S., Feolo, M., Funk, K., Geer, L.Y., Gorelenkov, V., Hoepfner, M., Holmes, B., Johnson, M.,  
354 Khotomlianski, V., Kimchi, A., Kimelman, M., Kitts, P., Klimke, W., Krasnov, S., Kuznetsov,  
355 A., Landrum, M.J., Landsman, D., Lee, J.M., Lipman, D.J., Lu, Z., Madden, T.L., Madej, T.,  
356 Marchler-Bauer, A., Karsch-Mizrachi, I., Murphy, T., Orris, R., Ostell, J., O'sullivan, C.,  
357 Panchenko, A., Phan, L., Preuss, D., Pruitt, K.D., Rodarmer, K., Rubinstein, W., Sayers, E.,  
358 Schneider, V., Schuler, G.D., Sherry, S.T., Sirotkin, K., Siyan, K., Slotta, D., Soboleva, A.,  
359 Soussov, V., Starchenko, G., Tatusova, T.A., Todorov, K., Trawick, B.W., Vakatov, D., Wang,  
360 Y., Ward, M., Wilbur, W.J., Yaschenko, E., Zbicz, K., 2016. Database resources of the  
361 National Center for Biotechnology Information. *Nucleic Acids Res.* 44, D7.  
362 <https://doi.org/10.1093/NAR/GKV1290>
- 363 Altschul, S.F., Gish, W., Miller, W., Myers, E.W., Lipman, D.J., 1990. Basic local alignment search  
364 tool. *J. Mol. Biol.* 215, 403–410. [https://doi.org/10.1016/S0022-2836\(05\)80360-2](https://doi.org/10.1016/S0022-2836(05)80360-2)
- 365 Antonio, M., Pretti, M, Galvani, R.G., Farias, A.S., Boroni, M., Antônio, M., Pretti, Marques, Lima,  
366 M., Martins, B., 2021. New SARS-CoV-2 lineages could evade CD8+ T-cells response.  
367 *bioRxiv* 2021.03.09.434584. <https://doi.org/10.1101/2021.03.09.434584>
- 368 Arts, E., Brown, S., Bulir, D., Charles, T.C., Degroot, C.T., Delatolla, R., Desaulniers, J.-P.,  
369 Edwards, E.A., Fuzzen, M., Gilbride, K., Gilchrist, J., Goodridge, L., Graber, T.E., Habash, M.,  
370 2022. Community Surveillance of Omicron in Ontario: Wastewater-based Epidemiology  
371 Comes of Age. <https://doi.org/10.21203/RS.3.RS-1439969/V2>

372 Carcereny, A., Martínez-Velázquez, A., Bosch, A., Allende, A., Truchado, P., Cascales, J.,  
373 Romalde, J.L., Lois, M., Polo, D., Sánchez, G., Pérez-Cataluña, A., Díaz-Reolid, A., Antón, A.,  
374 Gregori, J., Garcia-Cehic, D., Quer, J., Palau, M., Ruano, C.G., Pintó, R.M., Guix, S., 2021.  
375 Monitoring Emergence of the SARS-CoV-2 B.1.1.7 Variant through the Spanish National  
376 SARS-CoV-2 Wastewater Surveillance System (VATar COVID-19). *Environ. Sci. Technol.* 55,  
377 11756–11766. <https://doi.org/10.1021/acs.est.1c03589>

378 Chan, C.T.-M., Leung, J.S.-L., Lee, L.-K., Lo, H.W.-H., Wong, E.Y.-K., Wong, D.S.-H., Ng, T.T.-L.,  
379 Lao, H.-Y., Lu, K.K., Jim, S.H.-C., Yau, M.C.-Y., Lam, J.Y.-W., Ho, A.Y.-M., Luk, K.S., Yip, K.-T.,  
380 Que, T.-L., To, K.K.-W., Siu, G.K.-H., 2022. A low-cost TaqMan minor groove binder probe-  
381 based one-step RT-qPCR assay for rapid identification of N501Y variants of SARS-CoV-2. *J.*  
382 *Virol. Methods* 299, 114333. <https://doi.org/10.1016/j.jviromet.2021.114333>

383 D’Aoust, P.M., Graber, T.E., Mercier, E., Montpetit, D., Alexandrov, I., Neault, N., Baig, A.T.,  
384 Mayne, J., Zhang, X., Alain, T., Servos, M.R., Srikanthan, N., MacKenzie, M., Figeys, D.,  
385 Manuel, D., Jüni, P., MacKenzie, A.E., Delatolla, R., 2021. Catching a resurgence: Increase in  
386 SARS-CoV-2 viral RNA identified in wastewater 48 h before COVID-19 clinical tests and 96 h  
387 before hospitalizations. *Sci. Total Environ.* 770.  
388 <https://doi.org/10.1016/j.scitotenv.2021.145319>

389 Graber, T.E., Mercier, É., Bhatnagar, K., Fuzzen, M., D’Aoust, P.M., Hoang, H.D., Tian, X., Towhid,  
390 S.T., Plaza-Diaz, J., Eid, W., Alain, T., Butler, A., Goodridge, L., Servos, M., Delatolla, R.,  
391 2021. Near real-time determination of B.1.1.7 in proportion to total SARS-CoV-2 viral load  
392 in wastewater using an allele-specific primer extension PCR strategy. *Water Res.* 205,  
393 117681. <https://doi.org/10.1016/J.WATRES.2021.117681>

- 394 Hadfield, J., Megill, C., Bell, S.M., Huddleston, J., Potter, B., Callender, C., Sagulenko, P.,  
395 Bedford, T., Neher, R.A., 2018. NextStrain: Real-time tracking of pathogen evolution.  
396 *Bioinformatics* 34, 4121–4123. <https://doi.org/10.1093/bioinformatics/bty407>
- 397 Hamouda, M., Mustafa, F., Maraqa, M., Rizvi, T., Aly Hassan, A., 2021. Wastewater surveillance  
398 for SARS-CoV-2: Lessons learnt from recent studies to define future applications. *Sci. Total*  
399 *Environ.* 759, 143493. <https://doi.org/https://doi.org/10.1016/j.scitotenv.2020.143493>
- 400 Johnson, B.A., Zhou, Y., Lokugamage, K.G., Vu, M.N., Bopp, N., Crocquet-Valdes, P.A.,  
401 Schindewolf, C., Liu, Y., Scharton, D., Plante, J.A., Xie, X., Aguilar, P., Weaver, S.C., Shi, P.-Y.,  
402 Walker, D.H., Routh, A.L., Plante, K.S., Menachery, V.D., 2021. Nucleocapsid mutations in  
403 SARS-CoV-2 augment replication and pathogenesis. *bioRxiv* 2021.10.14.464390.  
404 <https://doi.org/10.1101/2021.10.14.464390>
- 405 Katoh, K., Misawa, K., Kuma, K.I., Miyata, T., 2002. MAFFT: a novel method for rapid multiple  
406 sequence alignment based on fast Fourier transform. *Nucleic Acids Res.* 30, 3059–3066.  
407 <https://doi.org/10.1093/NAR/GKF436>
- 408 Kiryanov, S.A., Levina, T.A., Konopleva, M. V., Suslov, A.P., 2022. Identification of Hotspot  
409 Mutations in the N Gene of SARS-CoV-2 in Russian Clinical Samples That May Affect the  
410 Detection by Reverse Transcription-PCR. *Diagnostics* 2022, Vol. 12, Page 147 12, 147.  
411 <https://doi.org/10.3390/DIAGNOSTICS12010147>
- 412 Kitajima, M., Ahmed, W., Bibby, K., Carducci, A., Gerba, C.P., Hamilton, K.A., Haramoto, E., Rose,  
413 J.B., 2020. SARS-CoV-2 in wastewater: State of the knowledge and research needs. *Sci.*  
414 *Total Environ.* 739, 139076.  
415 <https://doi.org/https://doi.org/10.1016/j.scitotenv.2020.139076>

- 416 Kumblathan, T., Liu, Y., Uppal, G.K., Hrudey, S.E., Li, X.-F., 2021. Wastewater-Based  
417 Epidemiology for Community Monitoring of SARS-CoV-2: Progress and Challenges. ACS  
418 Environ. Au 1, 18–31. <https://doi.org/10.1021/acsenvironau.1c00015>
- 419 Lee, W.L., Imakaev, M., Armas, F., McElroy, K.A., Gu, X., Duvallet, C., Chandra, F., Chen, H.,  
420 Leifels, M., Mendola, S., Floyd-O’Sullivan, R., Powell, M.M., Wilson, S.T., Berge, K.L.J., Lim,  
421 C.Y.J., Wu, F., Xiao, A., Moniz, K., Ghaeli, N., Matus, M., Thompson, J., Alm, E.J., 2021.  
422 Quantitative SARS-CoV-2 Alpha Variant B.1.1.7 Tracking in Wastewater by Allele-Specific  
423 RT-qPCR. Environ. Sci. Technol. Lett. 8, 675–682.  
424 <https://doi.org/10.1021/acs.estlett.1c00375>
- 425 Lu, X., Wang, L., Sakthivel, S.K., Whitaker, B., Murray, J., Kamili, S., Lynch, B., Malapati, L., Burke,  
426 S.A., Harcourt, J., Tamin, A., Thornburg, N.J., Villanueva, J.M., Lindstrom, S., 2020. US CDC  
427 Real-Time Reverse Transcription PCR Panel for Detection of Severe Acute Respiratory  
428 Syndrome Coronavirus 2. Emerg. Infect. Dis. 26, 1654–1665.  
429 <https://doi.org/10.3201/eid2608.201246>
- 430 Medema, G., Heijnen, L., Elsinga, G., Italiaander, R., Brouwer, A., 2020. Presence of SARS-  
431 Coronavirus-2 RNA in Sewage and Correlation with Reported COVID-19 Prevalence in the  
432 Early Stage of the Epidemic in The Netherlands. Environ. Sci. Technol. Lett. 7, 511–516.  
433 <https://doi.org/10.1021/acs.estlett.0c00357>
- 434 Pérez-Cataluña, A., Cuevas-Ferrando, E., Randazzo, W., Falcó, I., Allende, A., Sánchez, G., 2021.  
435 Comparing analytical methods to detect SARS-CoV-2 in wastewater. Sci. Total Environ. 758,  
436 143870. <https://doi.org/10.1016/J.SCITOTENV.2020.143870>
- 437 Peterson, S.W., Lidder, R., Daigle, J., Wonitowy, Q., Dueck, C., Nagasawa, A., Mulvey, M.R.,



438 Mangat, C.S., 2022. RT-qPCR detection of SARS-CoV-2 mutations S 69–70 del, S N501Y and  
439 N D3L associated with variants of concern in Canadian wastewater samples. *Sci. Total*  
440 *Environ.* 810, 151283. <https://doi.org/10.1016/J.SCITOTENV.2021.151283>

441 Syed, A.M., Taha, T.Y., Tabata, T., Chen, I.P., Ciling, A., Khalid, M.M., Sreekumar, B., Chen, P.-Y.,  
442 Hayashi, J.M., Soczek, K.M., Ott, M., Doudna, J.A., 2021. Rapid assessment of SARS-CoV-2  
443 evolved variants using virus-like particles. *Science* eabl6184.  
444 <https://doi.org/10.1126/science.abl6184>

445 Vogels, C.B.F., Breban, M.I., Ott, I.M., Alpert, T., Petrone, M.E., Watkins, A.E., Kalinich, C.C.,  
446 Earnest, R., Rothman, J.E., de Jesus, J.G., Claro, I.M., Ferreira, G.M., Crispim, M.A.E., Singh,  
447 L., Tegally, H., Anyaneji, U.J., Hodcroft, E.B., Mason, C.E., Khullar, G., Metti, J., Dudley, J.T.,  
448 MacKay, M.J., Nash, M., Wang, J., Liu, C., Hui, P., Murphy, S., Neal, C., Laszlo, E., Landry,  
449 M.L., Muyombwe, A., Downing, R., Razeq, J., de Oliveira, T., Faria, N.R., Sabino, E.C., Neher,  
450 R.A., Fauver, J.R., Grubaugh, N.D., da Silva Sales, F.C., Ramundo, M.S., Candido, D.S., Silva,  
451 C.A.M., de Pinho, M.C., Coletti, T. de M., Andrade, P. dos S., de Souza, L.M., Rocha, E.C.,  
452 Gomes Jardim, A.C., Manuli, E., Gaburo, N., Granato, C., Levi, J.E., Costa, S., de Souza,  
453 W.M., Salum, M.A., Pereira, R., de Souza, A., Matkin, L.E., Nogueira, M.L., Levin, A.S.,  
454 Mayaud, P., Alexander, N., Souza, R., Acosta, A.L., Prete, C., Quick, J., Brady, O., Messina, J.,  
455 Kraemer, M., Gouveia, N. da C., Oliva, I., de Souza, M., Lazari, C., Alencar, C.S., Thézé, J.,  
456 Buss, L., Araujo, L., Cunha, M.S., Loman, N.J., Pybus, O.G., Aguiar, R.S., Wilkinson, E.,  
457 Msomi, N., Iranzadeh, A., Fonseca, V., Doolabh, D., San, E.J., Mlisana, K., von Gottberg, A.,  
458 Walaza, S., Allam, M., Ismail, A., Mohale, T., Glass, A.J., Engelbrecht, S., van Zyl, G., Preiser,  
459 W., Petruccione, F., Sigal, A., Hardie, D., Marais, G., Hsiao, M., Korsman, S., Davies, M.A.,

460 Tyers, L., Mudau, I., York, D., Maslo, C., Goedhals, D., Abrahams, S., Laguda-Akingba, O.,  
461 Alisoltani-Dehkordi, A., Godzik, A., Wibmer, C.K., Sewell, B.T., Lourenço, J., Kosakovsky  
462 Pond, S.L., Weaver, S., Giovanetti, M., Alcantara, L.C.J., Martin, D., Bhiman, J.N.,  
463 Williamson, C., 2021. Multiplex qPCR discriminates variants of concern to enhance global  
464 surveillance of SARS-CoV-2. *PLoS Biol.* 19, e3001236.  
465 <https://doi.org/10.1371/journal.pbio.3001236>

466 Wu, F., Zhang, J., Xiao, A., Gu, X., Lee, W.L., Armas, F., Kauffman, K., Hanage, W., Matus, M.,  
467 Ghaeli, N., Endo, N., Duvallet, C., Poyet, M., Moniz, K., Washburne, A.D., Erickson, T.B.,  
468 Chai, P.R., Thompson, J., Alm, E.J., 2020. SARS-CoV-2 Titers in Wastewater Are Higher than  
469 Expected from Clinically Confirmed Cases. *mSystems* 5.  
470 <https://doi.org/10.1128/msystems.00614-20>

471 Wu, H., Xing, N., Meng, K., Fu, B., Xue, W., Dong, P., Tang, W., Xiao, Y., Liu, G., Luo, H., Zhu, W.,  
472 Lin, X., Meng, G., Zhu, Z., 2021. Nucleocapsid mutations R203K/G204R increase the  
473 infectivity, fitness, and virulence of SARS-CoV-2. *Cell Host Microbe* 29, 1788-1801.e6.  
474 <https://doi.org/10.1016/j.chom.2021.11.005>

475 Wurtzer, S., Waldman, P., Levert, M., Mouchel, J.M., Gorgé, O., Boni, M., Maday, Y.,  
476 consortium, O., Marechal, V., Moulin, L., 2021. Monitoring the propagation of SARS CoV2  
477 variants by tracking identified mutation in wastewater using specific RT-qPCR. *medRxiv*  
478 2021.03.10.21253291. <https://doi.org/10.1101/2021.03.10.21253291>

479 Yaniv, K., Ozer, E., Shagan, M., Lakkakula, S., Plotkin, N., Bhandarkar, N.S., Kushmaro, A., 2021.  
480 Direct RT-qPCR assay for SARS-CoV-2 variants of concern (Alpha, B.1.1.7 and Beta, B.1.351)  
481 detection and quantification in wastewater. *Environ. Res.* 201, 111653.

482 <https://doi.org/10.1016/j.envres.2021.111653>

483 Ye, J., Coulouris, G., Zaretskaya, I., Cutcutache, I., Rozen, S., Madden, T.L., 2012. Primer-BLAST:  
484 a tool to design target-specific primers for polymerase chain reaction. BMC Bioinformatics  
485 13, 134. <https://doi.org/10.1186/1471-2105-13-134/FIGURES/5>

486
